# Supplementary material for: Impact of fatigue, pain, and bowel incontinence on the quality of life of people living with Inflammatory Bowel Disease: a UK cross-sectional survey
Source: PubMed Central journal article supplement (PMC7616848; doi:10.1002/ueg2.12668), 2024-10-19
Supplement: EMS200112-supplement-Supplementary_Materials.pdf [file EMS200112-supplement-Supplementary_Materials.pdf]

# Impact of fatigue, pain and bowel incontinence on the quality of life of people living with Inflammatory Bowel Disease: a UK cross-sectional survey

## Supplementary material

|                                                                                                                                                                                                                                                              |    |
|--------------------------------------------------------------------------------------------------------------------------------------------------------------------------------------------------------------------------------------------------------------|----|
| Supplementary Figure S1: Distribution of EQ-5D-5L domains by IBD-related reported symptom .....                                                                                                                                                              | 2  |
| Supplementary Table S1: Definitions of variables included for selection in the final statistical model.....                                                                                                                                                  | 4  |
| Supplementary Table S2: Model specifications for impact of IBD symptoms on HRQoL .....                                                                                                                                                                       | 6  |
| Supplementary Table S3: Socio-demographic characteristics of the 8486 IBD-BOOST survey participants .....                                                                                                                                                    | 9  |
| Supplementary Table S4: Clinical characteristics of 8486 participants included in the IBD-BOOST survey by IBD diagnosis .....                                                                                                                                | 11 |
| Supplementary Table S5: Quality of life (EQ-5D utility) associated with IBD patients' socio-demographic and clinical characteristics (Initial QoL model).....                                                                                                | 13 |
| Supplementary Table S6: Quality of life (EQ-5D utility) associated with IBD patients' socio-demographic, clinical characteristics and severity of symptoms of fatigue, pain and bowel incontinence (N=8486 participants) .....                               | 14 |
| Supplementary Table S7: Quality of life (EQ-5D utility) associated with IBD patients' socio-demographic, clinical characteristics, symptoms of fatigue, pain and bowel incontinence and interactions with anxiety and depression (N=8486 participants) ..... | 16 |
| Supplementary Table S8: Quality of life (EQ-5D utility) associated with IBD patients' socio-demographic, clinical characteristics, symptoms of fatigue, pain and bowel incontinence, anxiety and depressions and IBD activity and control (N=8486).....      | 18 |
| Supplementary Table S9: Quality of life (EQ-5D utility) associated with socio-demographic, clinical characteristics, symptoms of fatigue, pain and bowel incontinence and with anxiety and depression, by IBD type .....                                     | 21 |
| Supplementary Table S10: Quality of life (EQ-5D utility) associated with socio-demographic, clinical characteristics, symptoms of fatigue, pain and bowel incontinence and with anxiety and depression, by gender .....                                      | 24 |

**Supplementary Figure S1: Distribution of EQ-5D-5L domains by IBD-related reported symptom**

a) EQ-5D domains among IBD participants with pain

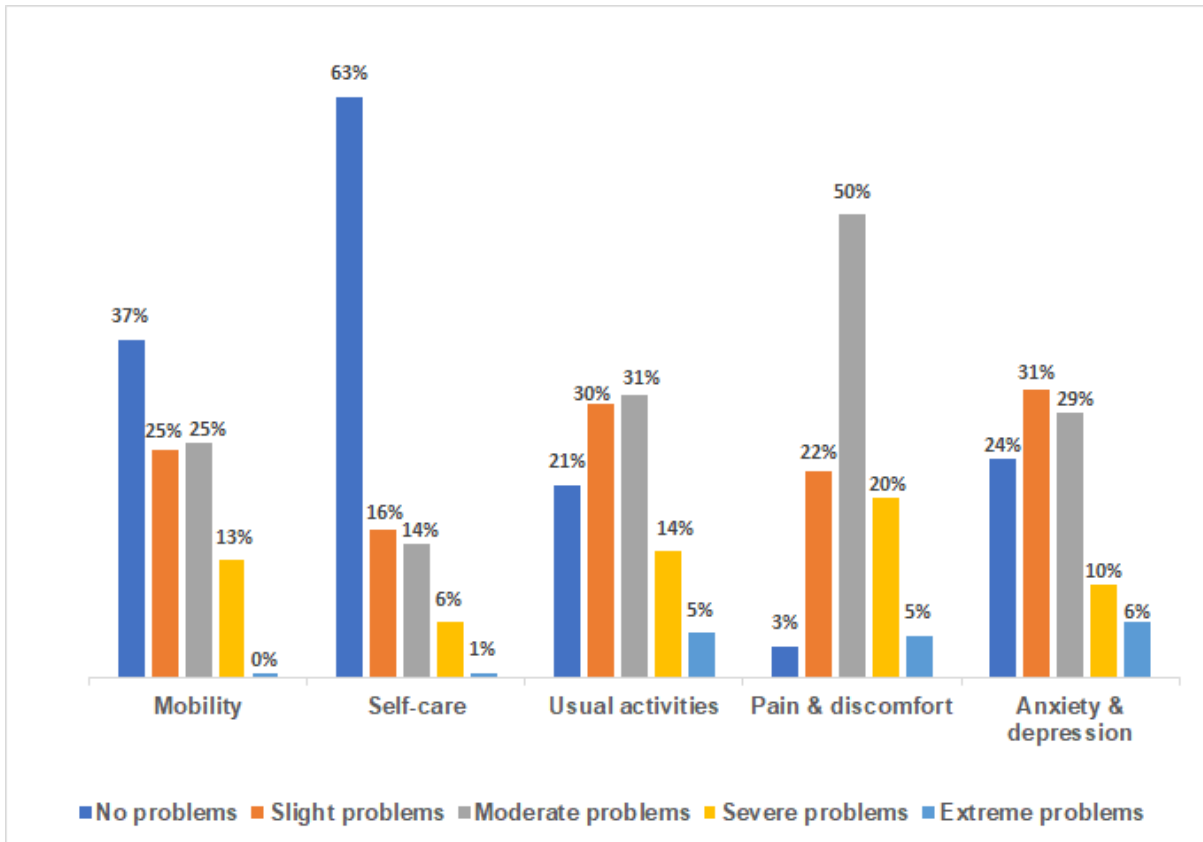

b) EQ-5D domains among IBD participants with fatigue

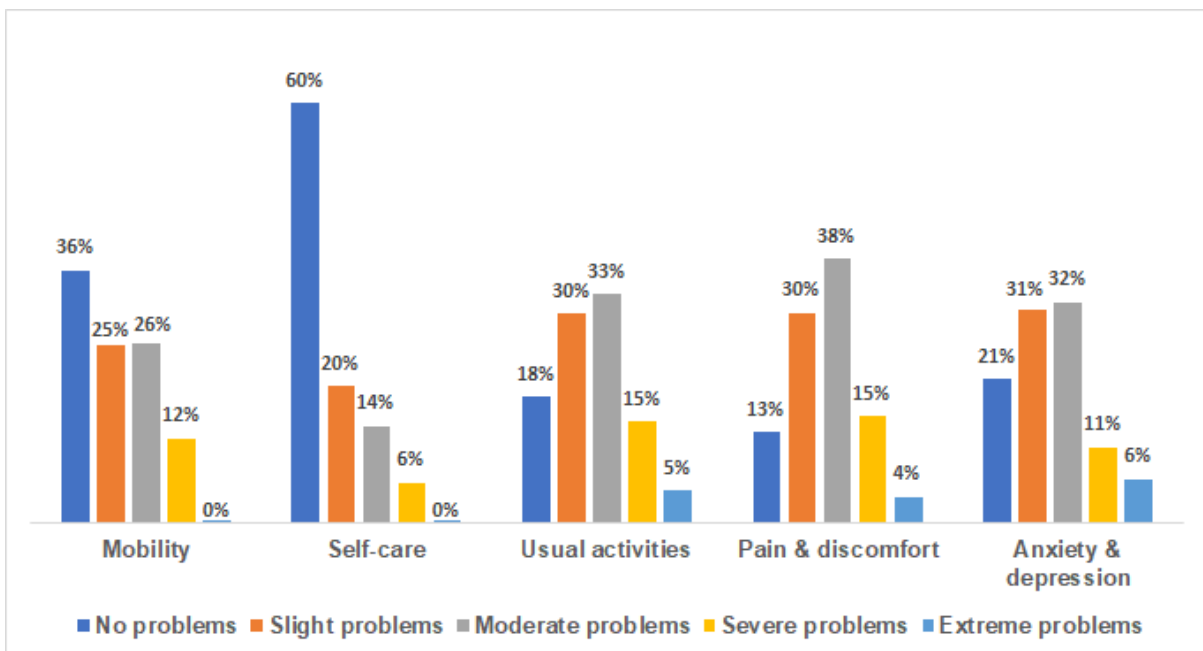

c) EQ-5D domains among IBD participants with incontinence

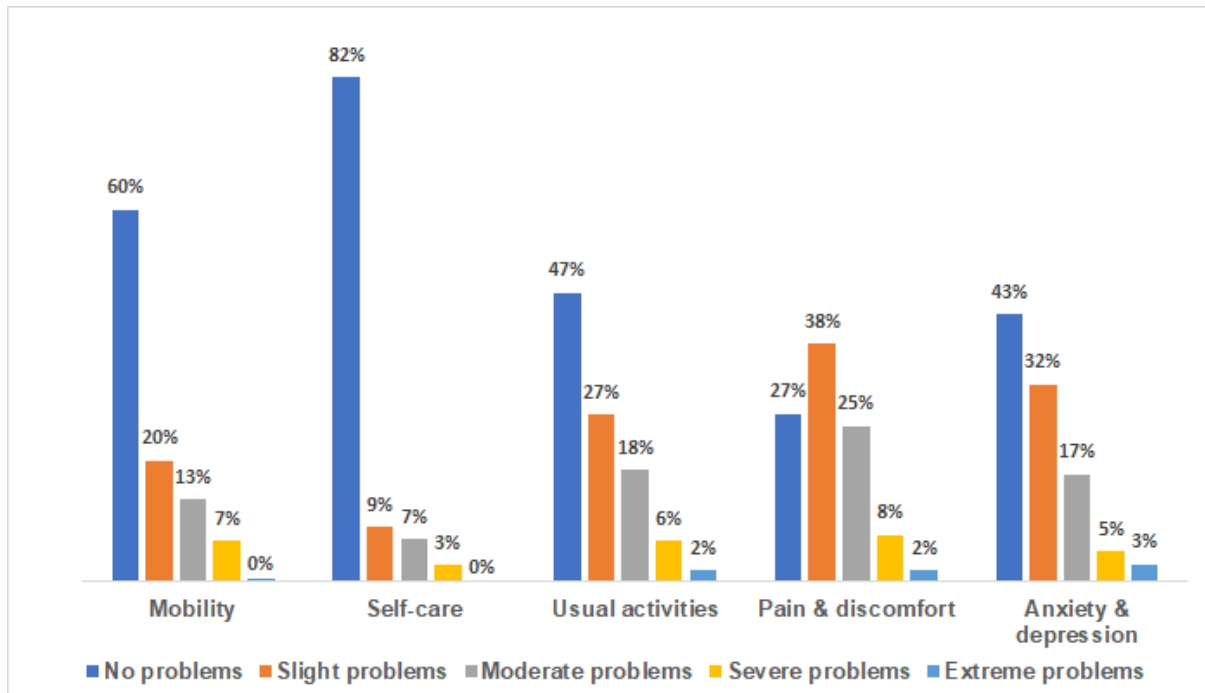

**Supplementary Table S1: Definitions of variables included for selection in the final statistical model**

| <b>Variables</b>                       | <b>Categories (if categorical)</b>                                                                 | <b>Note</b>                                                                    |
|----------------------------------------|----------------------------------------------------------------------------------------------------|--------------------------------------------------------------------------------|
| IBD type                               | Crohn's disease or Crohn's colitis<br>Other type of IBD                                            |                                                                                |
| Age                                    | 18-25, 26-35, 36-45, 46-55, 56-65,<br>66 and over                                                  |                                                                                |
| Gender                                 | Male, Female                                                                                       |                                                                                |
| Smoking status                         | Never smoked, Ex-smoker, Current<br>smoker                                                         |                                                                                |
| IMD quintile                           | 1 (most deprived), 2, 3, 4, 5 (least<br>deprived)                                                  | Measure of socioeconomic<br>status calculated using<br>self-reported postcode. |
| BMI (kg/m <sup>2</sup> )               | <25, >=25-<30, >=30-<35, >=35                                                                      | Based on self-reported<br>height and weight                                    |
| IBD surgery in the past                | Yes/No                                                                                             |                                                                                |
| IBD biologic medication                | Yes/No                                                                                             |                                                                                |
| IBD activity score or<br>Stoma/pouch   | 1 (low activity), 2, 3 (high activity), 4<br>(stoma/pouch)                                         | Tertiles in study<br>population                                                |
| IBD control score                      | 1 (best control), 2,3 (worst control)                                                              | Tertiles in study<br>population                                                |
| Physical health comorbidity            | Yes/No                                                                                             |                                                                                |
| Mental health comorbidity              | Yes/No                                                                                             |                                                                                |
| Time since IBD diagnosis (in<br>years) | 0-3, >4                                                                                            |                                                                                |
| Currently pregnant                     | Yes/No                                                                                             |                                                                                |
| Education level                        | No formal education, School (GCSE<br>or AS/A-levels), Further and higher<br>education              |                                                                                |
| Employment status                      | Employed, Unemployed due to<br>illness, Unemployed, Student or<br>homemaker, Retired               |                                                                                |
| Relationship status                    | Living alone, Living with someone                                                                  |                                                                                |
| Fatigue                                | 0-59 (no fatigue), 60 and over<br>(fatigue)                                                        | PROMIS fatigue score<br>(dichotomised)                                         |
| Pain                                   | 0-59 (no pain), 60 and over (pain)                                                                 | PROMIS pain score<br>(dichotomised)                                            |
| Incontinence                           | 0-4 (no incontinence), 5-20<br>(incontinence)                                                      | PROMIS Gastrointestinal<br>Bowel Incontinence score<br>(dichotomised)          |
| Anxiety                                | 0-4 (no anxiety), 5-9 (mild anxiety),<br>10-21 (moderate to severe anxiety)                        | GAD-7 scale for anxiety                                                        |
| Depression                             | 0-4 (no depression), 5-9 (mild to<br>moderate depression), 10-<br>27(moderately severe depression) | PHQ-9 scale for<br>depression                                                  |

Abbreviations: IBD: Inflammatory bowel disease; IMD: Indices of Multiple Deprivation; BMI: Body Mass Index; PROMIS: Patient-Reported Outcomes Measurement Information System; GAD-7: Generalised Anxiety Disorder Assessment; PHQ-9: Patient Health Questionnaire.

**Supplementary Table S2: Model specifications for impact of IBD symptoms on HRQoL**

| Outcome          | Model         | Key exposures                                                                                                                                                                            | Further predictors                                                                                                                                                                                                                                                                                                                                                      | Confounders:                                                                                                                                                                                                                                                                                                                                                                                                                                                                                                                                                                                                                                                                                                                                                                                                           |
|------------------|---------------|------------------------------------------------------------------------------------------------------------------------------------------------------------------------------------------|-------------------------------------------------------------------------------------------------------------------------------------------------------------------------------------------------------------------------------------------------------------------------------------------------------------------------------------------------------------------------|------------------------------------------------------------------------------------------------------------------------------------------------------------------------------------------------------------------------------------------------------------------------------------------------------------------------------------------------------------------------------------------------------------------------------------------------------------------------------------------------------------------------------------------------------------------------------------------------------------------------------------------------------------------------------------------------------------------------------------------------------------------------------------------------------------------------|
| EQ-5D-5L utility | Model stage 1 | <ul style="list-style-type: none"> <li>PROMIS pain intensity score<sup>1</sup></li> <li>PROMIS fatigue score<sup>1</sup></li> <li>PROMIS bowel incontinence score<sup>1</sup></li> </ul> | <p>Core (retained in all models)</p> <ul style="list-style-type: none"> <li>IBD Type (Crohn’s vs other IBD)</li> <li>Had IBD surgery in past (yes, no)</li> <li>IBD biologic medication (yes/no)</li> </ul> <p>Retain only if statistically significant (p&lt;0.05):</p> <ul style="list-style-type: none"> <li>Time since diagnosis (0-3 years vs 4+ years)</li> </ul> | <p>Core (retained in all models)</p> <ul style="list-style-type: none"> <li>Age (years)<sup>1</sup></li> <li>Gender</li> <li>Smoking status (never, ex, current)</li> <li>BMI (underweight, normal, overweight)</li> <li>IMD quintile (1: least deprived to 5: most deprived)</li> <li>Physical health comorbidity (yes/no)</li> <li>Mental health comorbidity (yes/no)</li> </ul> <p>Enter one at a time in this order and retain only if statistically significant (p&lt;0.05):</p> <ul style="list-style-type: none"> <li>Currently pregnant (yes/no)</li> <li>Education (no formal education, school (GCSE or AS/A-levels), “further &amp; higher education”)</li> <li>Employment (paid employment, unemployed due to illness/disease, all other)</li> <li>Relationship status (in relationship vs not)</li> </ul> |
| EQ-5D-5L utility | Model stage 2 | <p>Continuous or categorical (as indicated in Model 1):</p> <ul style="list-style-type: none"> <li>PROMIS pain intensity</li> <li>PROMIS fatigue</li> </ul>                              | <ul style="list-style-type: none"> <li>IBD Type (Crohn’s vs other IBD)</li> <li>Had IBD surgery in past (yes, no)</li> </ul>                                                                                                                                                                                                                                            | <p>Core (retained in all models)</p> <ul style="list-style-type: none"> <li>Age (years)*</li> <li>Gender</li> <li>Smoking status (never, ex, current)</li> </ul>                                                                                                                                                                                                                                                                                                                                                                                                                                                                                                                                                                                                                                                       |

|                  |               |                                                                                                                                                                                                                                                                                                     |                                                                                                                                                                                                                                                             |                                                                                                                                                                                                                                                                                                                                                                                                                                                                                                                                                                                                                                      |
|------------------|---------------|-----------------------------------------------------------------------------------------------------------------------------------------------------------------------------------------------------------------------------------------------------------------------------------------------------|-------------------------------------------------------------------------------------------------------------------------------------------------------------------------------------------------------------------------------------------------------------|--------------------------------------------------------------------------------------------------------------------------------------------------------------------------------------------------------------------------------------------------------------------------------------------------------------------------------------------------------------------------------------------------------------------------------------------------------------------------------------------------------------------------------------------------------------------------------------------------------------------------------------|
|                  |               | <ul style="list-style-type: none"> <li>PROMIS bowel incontinence</li> </ul> <p>Add all interaction terms between symptoms where more than 20% overlap in symptoms present.<br/>Retain interactions only if statistically significant (<math>p &lt; 0.05</math>).</p>                                | <ul style="list-style-type: none"> <li>IBD biologic medication (yes/no)</li> <li>(if statistically significant) Time since diagnosis (0-3 years vs 4+ years)</li> </ul>                                                                                     | <ul style="list-style-type: none"> <li>BMI (underweight, normal, overweight)</li> <li>IMD quintile (1: least deprived to 5: most deprived)</li> <li>Physical health comorbidity (yes/no)</li> <li>Mental health comorbidity (yes/no)</li> </ul> <p>Those retained from model stage 1 only from:</p> <ul style="list-style-type: none"> <li>Currently pregnant (yes/no)</li> <li>Education (no formal education, school (GCSE or AS/A-levels), "further &amp; higher education")</li> <li>Employment (paid employment, unemployed due to illness/disease, all other)</li> <li>Relationship status (in relationship vs not)</li> </ul> |
| EQ-5D-5L utility | Model stage 3 | <p>Continuous or categorical (as indicated in Model 1):</p> <ul style="list-style-type: none"> <li>PROMIS pain intensity</li> <li>PROMIS fatigue</li> <li>PROMIS bowel incontinence</li> </ul> <p>Retained interactions between pain, fatigue, and bowel incontinence.</p> <p>Further symptoms:</p> | <ul style="list-style-type: none"> <li>IBD Type (Crohn's vs other IBD)</li> <li>Had IBD surgery in past (yes, no)</li> <li>IBD biologic medication (yes/no)</li> <li>(if statistically significant) Time since diagnosis (0-3 years vs 4+ years)</li> </ul> | <p>Core (retained in all models)</p> <ul style="list-style-type: none"> <li>Age (years)*</li> <li>Gender</li> <li>Smoking status (never, ex, current)</li> <li>BMI (underweight, normal, overweight)</li> <li>IMD quintile (1: least deprived to 5: most deprived)</li> <li>Physical health comorbidity (yes/no)</li> <li>Mental health comorbidity (yes/no)</li> </ul>                                                                                                                                                                                                                                                              |

|  |  |                                                                                                                                                                                                                                                                                                                                                                                                                                                             |  |                                                                                                                                                                                                                                                                                                                                                                                              |
|--|--|-------------------------------------------------------------------------------------------------------------------------------------------------------------------------------------------------------------------------------------------------------------------------------------------------------------------------------------------------------------------------------------------------------------------------------------------------------------|--|----------------------------------------------------------------------------------------------------------------------------------------------------------------------------------------------------------------------------------------------------------------------------------------------------------------------------------------------------------------------------------------------|
|  |  | <ul style="list-style-type: none"> <li>• GAD-7 score for anxiety (no anxiety; mild; moderate to severe anxiety)</li> <li>• PHQ-9 score for depression (no depression; mild to moderate; moderately severe depression)</li> </ul> <p>Add all interaction terms between the three key symptoms and anxiety and depression where more than 20% overlap symptoms present. Retain interactions only if statistically significant (<math>p &lt; 0.05</math>).</p> |  | <p>Those retained from model stage 1 only from:</p> <ul style="list-style-type: none"> <li>• Currently pregnant (yes/no)</li> <li>• Education (no formal education, school (GCSE or AS/A-levels), “further &amp; higher education”)</li> <li>• Employment (paid employment, unemployed due to illness/disease, all other)</li> <li>• Relationship status (in relationship vs not)</li> </ul> |
|--|--|-------------------------------------------------------------------------------------------------------------------------------------------------------------------------------------------------------------------------------------------------------------------------------------------------------------------------------------------------------------------------------------------------------------------------------------------------------------|--|----------------------------------------------------------------------------------------------------------------------------------------------------------------------------------------------------------------------------------------------------------------------------------------------------------------------------------------------------------------------------------------------|

<sup>1</sup>Nonlinearity in continuous variables will be checked in final models and, if necessary, addressed using categorisation (symptom scores) or spline functions (age)

IBD: Inflammatory bowel disease; IMD: Indices of Multiple Deprivation; BMI: Body Mass Index; EQ-5D-5L: 5-level EQ-5D version; PROMIS: Patient-Reported Outcomes Measurement Information System; GAD-7: Generalised Anxiety Disorder Assessment; PHQ-9: Patient Health Questionnaire.



**Supplementary Table S3: Socio-demographic characteristics of the 8486 IBD-BOOST survey participants**

| Characteristic                              | Type of IBD                 |         |                       |         |                   |         |
|---------------------------------------------|-----------------------------|---------|-----------------------|---------|-------------------|---------|
|                                             | Crohn's Disease<br>(n=4168) |         | Other IBD<br>(n=4318) |         | Total<br>(n=8486) |         |
| <b>Gender</b>                               |                             |         |                       |         |                   |         |
| Male                                        | 1479                        | (35.5%) | 1806                  | (41.8%) | 3285              | (38.7%) |
| Female                                      | 2550                        | (61.2%) | 2338                  | (54.1%) | 4888              | (57.6%) |
| Missing                                     | 139                         | (3.3%)  | 174                   | (4.0%)  | 313               | (3.7%)  |
| <b>Participant age (in years) mean (SD)</b> | 48.1                        | (15.1)  | 51.4                  | (15.6)  | 49.8              | (15.4)  |
| <b>Age group</b>                            |                             |         |                       |         |                   |         |
| 18-25                                       | 294                         | (7.1%)  | 201                   | (4.7%)  | 495               | (5.8%)  |
| 26-35                                       | 688                         | (16.5%) | 606                   | (14.0%) | 1294              | (15.2%) |
| 36-45                                       | 759                         | (18.2%) | 751                   | (17.4%) | 1510              | (17.8%) |
| 46-55                                       | 917                         | (22.0%) | 758                   | (17.6%) | 1675              | (19.7%) |
| 56-65                                       | 803                         | (19.3%) | 924                   | (21.4%) | 1727              | (20.4%) |
| 66 over                                     | 570                         | (13.7%) | 911                   | (21.1%) | 1481              | (17.5%) |
| Missing                                     | 137                         | (3.3%)  | 167                   | (3.9%)  | 304               | (3.6%)  |
| <b>Ethnicity</b>                            |                             |         |                       |         |                   |         |
| White                                       | 3840                        | (92.1%) | 3911                  | (90.6%) | 7751              | (91.3%) |
| Mixed                                       | 60                          | (1.4%)  | 58                    | (1.3%)  | 118               | (1.4%)  |
| Asian                                       | 78                          | (1.9%)  | 131                   | (3.0%)  | 209               | (2.5%)  |
| Black                                       | 22                          | (0.5%)  | 13                    | (0.3%)  | 35                | (0.4%)  |
| Any other                                   | 31                          | (0.7%)  | 40                    | (0.9%)  | 71                | (0.8%)  |
| Missing                                     | 137                         | (3.3%)  | 165                   | (3.8%)  | 302               | (3.6%)  |
| <b>Educational level</b>                    |                             |         |                       |         |                   |         |
| No formal education                         | 98                          | (2.4%)  | 121                   | (2.8%)  | 219               | (2.6%)  |
| School (GCSE or AS/A-levels)                | 1166                        | (28.0%) | 1111                  | (25.7%) | 2277              | (26.8%) |
| Further and Higher education                | 2753                        | (66.1%) | 2908                  | (67.3%) | 5661              | (66.7%) |
| Missing                                     | 151                         | (3.6%)  | 178                   | (4.1%)  | 329               | (3.9%)  |
| <b>Employment status</b>                    |                             |         |                       |         |                   |         |
| Employed                                    | 2540                        | (60.9%) | 2531                  | (58.6%) | 5071              | (59.8%) |
| Unemployed due to illness                   | 330                         | (7.9%)  | 169                   | (3.9%)  | 499               | (5.9%)  |
| Unemployed                                  | 119                         | (2.9%)  | 99                    | (2.3%)  | 218               | (2.6%)  |

|                            |      |         |      |         |      |         |
|----------------------------|------|---------|------|---------|------|---------|
| Student or Homemaker       | 258  | (6.2%)  | 209  | (4.8%)  | 467  | (5.5%)  |
| Retired                    | 778  | (18.7%) | 1143 | (26.5%) | 1921 | (22.6%) |
| Missing                    | 143  | (3.4%)  | 167  | (3.9%)  | 310  | (3.7%)  |
| <b>Relationship status</b> |      |         |      |         |      |         |
| Living alone               | 1260 | (30.2%) | 1118 | (25.9%) | 2378 | (28.0%) |
| Living with someone        | 2756 | (66.1%) | 3023 | (70.0%) | 5779 | (68.1%) |
| Missing                    | 152  | (3.6%)  | 177  | (4.1%)  | 329  | (3.9%)  |
| <b>IMD quintile</b>        |      |         |      |         |      |         |
| 1 (most deprived)          | 550  | (13.2%) | 574  | (13.3%) | 1124 | (13.2%) |
| 2                          | 662  | (15.9%) | 695  | (16.1%) | 1357 | (16.0%) |
| 3                          | 795  | (19.1%) | 816  | (18.9%) | 1611 | (19.0%) |
| 4                          | 833  | (20.0%) | 876  | (20.3%) | 1709 | (20.1%) |
| 5 (least deprived)         | 859  | (20.6%) | 897  | (20.8%) | 1756 | (20.7%) |
| Missing                    | 469  | (11.3%) | 460  | (10.7%) | 929  | (10.9%) |
| <b>Smoking status</b>      |      |         |      |         |      |         |
| Never smoked               | 2072 | (49.7%) | 2093 | (48.5%) | 4165 | (49.1%) |
| Ex-smoker                  | 1577 | (37.8%) | 1887 | (43.7%) | 3464 | (40.8%) |
| Current smoker             | 367  | (8.8%)  | 162  | (3.8%)  | 529  | (6.2%)  |
| Missing                    | 152  | (3.6%)  | 176  | (4.1%)  | 328  | (3.9%)  |
| <b>Alcohol intake</b>      |      |         |      |         |      |         |
| Never                      | 1931 | (46.3%) | 1556 | (36.0%) | 3487 | (41.1%) |
| 1-14 units                 | 1817 | (43.6%) | 2179 | (50.5%) | 3996 | (47.1%) |
| 15 or more units           | 268  | (6.4%)  | 406  | (9.4%)  | 674  | (7.9%)  |
| Missing                    | 152  | (3.6%)  | 177  | (4.1%)  | 329  | (3.9%)  |

IBD: Inflammatory bowel disease; IMD: Indices of Multiple Deprivation; SD: Standard Deviation; BMI: Body Mass Index; EQ-5D-5L: 5-level EQ-5D version; PROMIS: Patient-Reported Outcomes Measurement Information System; GAD-7: Generalised Anxiety Disorder Assessment; PHQ-9: Patient Health Questionnaire

**Supplementary Table S4: Clinical characteristics of 8486 participants included in the IBD-BOOST survey by IBD diagnosis**

| Characteristic                            | Type of IBD                 |         |                       |         |                   |         |
|-------------------------------------------|-----------------------------|---------|-----------------------|---------|-------------------|---------|
|                                           | Crohn's Disease<br>(n=4168) |         | Other IBD<br>(n=4318) |         | Total<br>(n=8486) |         |
| <b>BMI (kg/m<sup>2</sup>) – mean (SD)</b> | 26.8                        | (6.0)   | 26.9                  | (5.8)   | 26.8              | (5.9)   |
| <b>BMI ranges</b>                         |                             |         |                       |         |                   |         |
| Healthy Weight, n(%)                      | 1625                        | (39.0%) | 1590                  | (36.8%) | 3215              | (37.9%) |
| Underweight, n(%)                         | 121                         | (2.9%)  | 74                    | (1.7%)  | 195               | (2.3%)  |
| Overweight, n(%)                          | 2151                        | (51.6%) | 2321                  | (53.8%) | 4472              | (52.7%) |
| Missing, n(%)                             | 271                         | (6.5%)  | 333                   | (7.7%)  | 604               | (7.1%)  |
| <b>Operation for IBD in the past</b>      |                             |         |                       |         |                   |         |
| No, n(%)                                  | 1930                        | (46.3%) | 3805                  | (88.1%) | 5735              | (67.6%) |
| Yes, n(%)                                 | 2142                        | (51.4%) | 398                   | (9.2%)  | 2540              | (29.9%) |
| Missing, n(%)                             | 96                          | (2.3%)  | 115                   | (2.7%)  | 211               | (2.5%)  |
| <b>Having stoma</b>                       |                             |         |                       |         |                   |         |
| No, n(%)                                  | 3761                        | (90.2%) | 4087                  | (94.7%) | 7848              | (92.5%) |
| Yes, n(%)                                 | 382                         | (9.2%)  | 167                   | (3.9%)  | 549               | (6.5%)  |
| Missing, n(%)                             | 25                          | (0.6%)  | 64                    | (1.5%)  | 89                | (1.0%)  |
| <b>Having pouch</b>                       |                             |         |                       |         |                   |         |
| No, n(%)                                  | 4061                        | (97.4%) | 4114                  | (95.3%) | 8175              | (96.3%) |
| Yes, n(%)                                 | 73                          | (1.8%)  | 136                   | (3.1%)  | 209               | (2.5%)  |
| Missing, n(%)                             | 34                          | (0.8%)  | 68                    | (1.6%)  | 102               | (1.2%)  |
| <b>Had fistula surgery in the past</b>    |                             |         |                       |         |                   |         |
| 0, n(%)                                   | 3340                        | (80.1%) | 3837                  | (88.9%) | 7177              | (84.6%) |
| 1, n(%)                                   | 808                         | (19.4%) | 425                   | (9.8%)  | 1233              | (14.5%) |
| Missing, n(%)                             | 20                          | (0.5%)  | 56                    | (1.3%)  | 76                | (0.9%)  |
| <b>Biologic medications</b>               |                             |         |                       |         |                   |         |
| No, n(%)                                  | 1667                        | (40.0%) | 2425                  | (56.2%) | 4092              | (48.2%) |
| Yes, n(%)                                 | 1925                        | (46.2%) | 983                   | (22.8%) | 2908              | (34.3%) |
| Missing, n(%)                             | 576                         | (13.8%) | 910                   | (21.1%) | 1486              | (17.5%) |
| <b>Having physical comorbidities</b>      |                             |         |                       |         |                   |         |
| No, n(%)                                  | 2617                        | (62.8%) | 2621                  | (60.7%) | 5238              | (61.7%) |
| Yes, n(%)                                 | 1551                        | (37.2%) | 1697                  | (39.3%) | 3248              | (38.3%) |
| <b>Having mental health comorbidities</b> |                             |         |                       |         |                   |         |
| No, n(%)                                  | 3085                        | (74.0%) | 3444                  | (79.8%) | 6529              | (76.9%) |
| Yes, n(%)                                 | 1083                        | (26.0%) | 874                   | (20.2%) | 1957              | (23.1%) |
| <b>Pregnant</b>                           |                             |         |                       |         |                   |         |
| No, n(%)                                  | 3902                        | (93.6%) | 3994                  | (92.5%) | 7896              | (93.0%) |
| Yes, n(%)                                 | 37                          | (0.9%)  | 26                    | (0.6%)  | 63                | (0.7%)  |
| Missing, n(%)                             | 229                         | (5.5%)  | 298                   | (6.9%)  | 527               | (6.2%)  |

|                                                          |      |         |      |         |      |         |
|----------------------------------------------------------|------|---------|------|---------|------|---------|
| <b>PROMIS fatigue T-score – mean (SD)</b>                | 54.8 | (8.8)   | 52.4 | (8.9)   | 53.6 | (9.0)   |
| <b>Fatigue levels</b>                                    |      |         |      |         |      |         |
| 0-49 (mild), n(%)                                        | 1144 | (27.5%) | 1618 | (37.5%) | 2762 | (32.6%) |
| 50-59 (moderate) , n(%)                                  | 1653 | (39.7%) | 1609 | (37.3%) | 3262 | (38.4%) |
| 60 and over (severe) , n(%)                              | 1186 | (28.5%) | 850  | (19.7%) | 2036 | (24.0%) |
| Missing, n(%)                                            | 185  | (4.4%)  | 241  | (5.6%)  | 426  | (5.0%)  |
| <b>PROMIS pain intensity T-score – mean (SD)</b>         | 51.3 | (11.3)  | 48.4 | (10.9)  | 49.8 | (11.2)  |
| <b>Pain levels</b>                                       |      |         |      |         |      |         |
| 0-49, n(%)                                               | 1785 | (42.8%) | 2240 | (51.9%) | 4025 | (47.4%) |
| 50-59, n(%)                                              | 1252 | (30.0%) | 1178 | (27.3%) | 2430 | (28.6%) |
| 60 and over, n(%)                                        | 1041 | (25.0%) | 728  | (16.7%) | 1769 | (20.9%) |
| Missing, n(%)                                            | 90   | (2.2%)  | 172  | (3.9%)  | 262  | (3.1%)  |
| <b>PROMIS bowel incontinence (raw) score – mean (SD)</b> | 6.8  | (3.5)   | 6.4  | (3.4)   | 6.6  | (3.4)   |
| <b>Incontinence levels</b>                               |      |         |      |         |      |         |
| 0-4, n(%)                                                | 1349 | (32.4%) | 1736 | (40.2%) | 3085 | (36.3%) |
| 5-9, n(%)                                                | 1600 | (38.4%) | 1584 | (36.7%) | 3184 | (37.5%) |
| 10-20, n(%)                                              | 723  | (17.4%) | 655  | (15.2%) | 1378 | (16.2%) |
| Missing, n(%)                                            | 496  | (11.9%) | 343  | (8.0%)  | 839  | (9.9%)  |
| <b>GAD-7 score for anxiety – mean (SD)</b>               | 5.9  | (5.6)   | 5.2  | (5.4)   | 5.6  | (5.5)   |
| <b>Anxiety levels</b>                                    |      |         |      |         |      |         |
| No anxiety, n(%)                                         | 2032 | (48.8%) | 2321 | (53.8%) | 4353 | (51.3%) |
| Mild anxiety, n(%)                                       | 1047 | (25.1%) | 1050 | (24.3%) | 2097 | (24.7%) |
| Moderate to severe anxiety, n(%)                         | 952  | (22.8%) | 781  | (18.1%) | 1733 | (20.4%) |
| Missing, n(%)                                            | 137  | (3.3%)  | 166  | (3.8%)  | 303  | (3.6%)  |
| <b>PHQ-9 score for depression – mean (SD)</b>            | 7.5  | (6.3)   | 6.3  | (6.0)   | 6.9  | (6.2)   |
| <b>Depression levels</b>                                 |      |         |      |         |      |         |
| No depression, n(%)                                      | 1663 | (39.9%) | 2078 | (48.1%) | 3741 | (44.1%) |
| Mild to moderate depression, n(%)                        | 1074 | (25.8%) | 1058 | (24.5%) | 2132 | (25.1%) |
| Moderately severe depression, n(%)                       | 1289 | (30.9%) | 1017 | (23.6%) | 2306 | (27.2%) |
| Missing, n(%)                                            | 142  | (3.4%)  | 165  | (3.8%)  | 307  | (3.6%)  |

Continuous characteristics summarised across participants with nonmissing data.

IBD: Inflammatory bowel disease; IMD: Indices of Multiple Deprivation; SD: Standard Deviation; BMI: Body Mass Index; EQ-5D-5L: 5-level EQ-5D version.

**Supplementary Table S5: Quality of life (EQ-5D utility) associated with IBD patients' socio-demographic and clinical characteristics (Initial QoL model)**

| Characteristic                                                          | Mean (SE)       |
|-------------------------------------------------------------------------|-----------------|
| <b>QoL of reference individual<sup>1</sup></b>                          | 0.862 (0.011)*  |
| <b>Female sex</b>                                                       | -0.037 (0.004)* |
| <b>Age at time of EQ-5D questionnaire (per 10 years, centred at 50)</b> | 0.009 (0.002)*  |
| <b>Time since diagnosis (ref: 0-3 years)</b>                            |                 |
| 4 years and over                                                        | 0.023 (0.006)*  |
| <b>Pregnant</b>                                                         | 0.045 (0.026)   |
| <b>Smoking status (ref: never smoker)</b>                               |                 |
| Ex-smoker                                                               | -0.028 (0.005)* |
| Current smoker                                                          | -0.059 (0.009)* |
| <b>BMI (ref: normal weight)</b>                                         |                 |
| Underweight                                                             | -0.054 (0.014)* |
| Overweight                                                              | -0.038 (0.005)* |
| <b>IMD quintile (ref: 3)</b>                                            |                 |
| 1                                                                       | -0.011 (0.008)  |
| 2                                                                       | 0.009 (0.007)   |
| 4                                                                       | -0.002 (0.007)  |
| 5                                                                       | 0.004 (0.007)   |
| <b>Education level (ref: GCSE or AS/A-levels)</b>                       |                 |
| No education                                                            | -0.030 (0.014)* |
| Further and Higher education                                            | 0.019 (0.005)*  |
| <b>Employment status (ref: employed)</b>                                |                 |
| Unemployed due to illness                                               | -0.321 (0.010)* |
| Unemployed                                                              | -0.106 (0.014)* |
| Student or Homemaker                                                    | -0.018 (0.009)  |
| Retired                                                                 | -0.022 (0.007)* |
| <b>Living circumstances (ref: living alone)</b>                         |                 |
| Living with someone                                                     | 0.026 (0.005)*  |
| <b>IBD type (ref: Crohn's disease)</b>                                  |                 |
| Other IBD                                                               | 0.006 (0.005)   |
| <b>IBD operation</b>                                                    | -0.020 (0.005)* |
| <b>Use of biologic medication</b>                                       | -0.021 (0.005)* |
| <b>Physical comorbidity</b>                                             | -0.048 (0.004)* |
| <b>Mental comorbidity</b>                                               | -0.143 (0.005)* |

IBD activity: CD activity tertiles (1:0-13, 2:14-94, 3:95 and over), UC activity tertiles (1:0, 2:1, 3:2-6);

\*p-value<0.05

<sup>1</sup>50 years old man with Crohn's disease, diagnosed in last 3 years, not pregnant, without operation and not receiving biologic medication, never smoker, normal weight, living alone and in an area of average socioeconomic deprivation, educated at GCSE or AS/A levels, employed and without physical or mental health comorbidities.

**Supplementary Table S6: Quality of life (EQ-5D utility) associated with IBD patients' socio-demographic, clinical characteristics and severity of symptoms of fatigue, pain and bowel incontinence (N=8486 participants)**

|                                                                     | <b>Stage 1</b>   |
|---------------------------------------------------------------------|------------------|
| <b>Characteristic</b>                                               | <b>Mean (SE)</b> |
| QoL of reference individual <sup>1</sup>                            | 0.961 (0.009)*   |
| <b>Female sex</b>                                                   | 0.004 (0.004)    |
| <b>Age at time of EQ-5D questionnaire (per 10 y, centred at 50)</b> | 0.003 (0.002)    |
| <b>Time since diagnosis (ref: 0-3 years)</b>                        |                  |
| 4 years and over                                                    | 0.000 (0.005)    |
| <b>Pregnant</b>                                                     | 0.011 (0.022)    |
| <b>Smoking status (ref: never smoker)</b>                           |                  |
| Ex-smoker                                                           | -0.010 (0.004)*  |
| Current smoker                                                      | -0.023 (0.007)*  |
| <b>BMI (ref: normal weight)</b>                                     |                  |
| Underweight                                                         | -0.027 (0.011)*  |
| Overweight                                                          | -0.017 (0.004)*  |
| <b>IMD quintile (ref: 3)</b>                                        |                  |
| 1                                                                   | -0.011 (0.007)   |
| 2                                                                   | 0.003 (0.006)    |
| 4                                                                   | -0.003 (0.006)   |
| 5                                                                   | -0.002 (0.006)   |
| <b>Education level (ref: GCSE or AS/A-levels)</b>                   |                  |
| No education                                                        | -0.013 (0.011)   |
| Further and Higher education                                        | 0.002 (0.004)    |
| <b>Employment status (ref: employed)</b>                            |                  |
| Unemployed due to illness                                           | -0.208 (0.008)*  |
| Unemployed                                                          | -0.062 (0.011)*  |
| Student or Homemaker                                                | -0.015 (0.008)   |
| Retired                                                             | -0.037 (0.006)*  |
| <b>Living circumstances (ref: living alone)</b>                     |                  |
| Living with someone                                                 | 0.016 (0.004)*   |
| <b>IBD type (ref: Crohn's disease)</b>                              |                  |
| Other IBD                                                           | -0.004 (0.004)   |
| <b>IBD operation</b>                                                | -0.002 (0.004)   |
| <b>Use of biologic medication (ref: No)</b>                         | -0.001 (0.004)   |
| <b>Physical comorbidity</b>                                         | -0.028 (0.004)*  |
| <b>Mental comorbidity</b>                                           | -0.086 (0.004)*  |
| <b>PROMIS pain score (ref: 0-49, low pain)**</b>                    |                  |
| 50-59                                                               | -0.071 (0.004)*  |

|                                                                 |                 |
|-----------------------------------------------------------------|-----------------|
| 60 and over                                                     | -0.184 (0.006)* |
| <b>PROMIS fatigue score (ref: 0-49, low fatigue)**</b>          |                 |
| 50-59                                                           | -0.048 (0.004)* |
| 60 and over                                                     | -0.161 (0.006)* |
| <b>PROMIS incontinence score (ref: 0-4, low incontinence)**</b> |                 |
| 5-9                                                             | -0.019 (0.004)  |
| 10-20                                                           | -0.063 (0.006)* |

\*p-value<0.05; \*\*p<sub>trend</sub><0.001

<sup>1</sup>50 years old man with Crohn's disease, diagnosed in last 3 years, not pregnant, normal weight, living alone and in an area of average socioeconomic deprivation, educated at GCSE or AS/A levels, employed, without operation and not receiving biologic medication, never smoker, without physical or mental health comorbidities, without symptoms of pain, fatigue, incontinence.

IBD: Inflammatory bowel disease; IMD: Indices of Multiple Deprivation; SE: Standard Error; BMI: Body Mass Index; QoL: Quality of Life; PROMIS: Patient-Reported Outcomes Measurement Information System; GAD-7: Generalised Anxiety Disorder Assessment; PHQ-9: Patient Health Questionnaire.

**Supplementary Table S7: Quality of life (EQ-5D utility) associated with IBD patients' socio-demographic, clinical characteristics, symptoms of fatigue, pain and bowel incontinence and interactions with anxiety and depression (N=8486 participants)**

| <b>Characteristic</b>                                               | <b>Mean (SE)</b> |
|---------------------------------------------------------------------|------------------|
| <b>QoL of reference individual<sup>1</sup></b>                      | 0.959 (0.009)*   |
| <b>Female sex</b>                                                   | -0.005 (0.004)   |
| <b>Age at time of EQ-5D questionnaire (per 10 y, centred at 50)</b> | -0.001 (0.002)   |
| <b>Time since diagnosis (ref: 0-3 years)</b>                        |                  |
| 4 years and over                                                    | -0.003 (0.005)   |
| <b>Pregnant</b>                                                     | -0.002 (0.021)   |
| <b>Smoking status (ref: Never smoker)</b>                           |                  |
| Ex-smoker                                                           | -0.013 (0.004)*  |
| Current smoker                                                      | -0.017 (0.007)*  |
| <b>BMI (ref: normal weight)</b>                                     |                  |
| Underweight                                                         | -0.030 (0.011)*  |
| Overweight                                                          | -0.016 (0.004)*  |
| <b>IMD quintile (ref: 3)</b>                                        |                  |
| 1                                                                   | -0.009 (0.006)   |
| 2                                                                   | 0.001 (0.006)    |
| 4                                                                   | -0.001 (0.006)   |
| 5                                                                   | 0.002 (0.005)    |
| <b>Education level (ref: GCSE or AS/A-levels)</b>                   |                  |
| No education                                                        | -0.009 (0.011)   |
| Further and Higher education                                        | 0.002 (0.004)    |
| <b>Employment status (ref: employed)</b>                            |                  |
| Unemployed due to illness                                           | -0.199 (0.008)*  |
| Unemployed                                                          | -0.055 (0.011)*  |
| Student or Homemaker                                                | -0.016 (0.007)*  |
| Retired                                                             | -0.038 (0.005)*  |
| <b>Living circumstances (ref: living alone)</b>                     |                  |
| Living with someone                                                 | 0.012 (0.004)*   |
| <b>IBD type (ref: Crohn's disease)</b>                              |                  |
| Other IBD                                                           | 0.000 (0.004)    |
| <b>IBD operation</b>                                                | -0.005 (0.004)   |
| <b>Use of biologic medication</b>                                   | -0.003 (0.004)   |
| <b>Physical comorbidity</b>                                         | -0.028 (0.004)*  |
| <b>Mental comorbidity</b>                                           | -0.054 (0.004)*  |
| <b>PROMIS pain (Yes)</b>                                            | -0.108 (0.006)*  |
| <b>PROMIS fatigue (Yes)</b>                                         | -0.051 (0.009)*  |



|                                                        |                 |
|--------------------------------------------------------|-----------------|
| <b>PROMIS incontinence (Yes)</b>                       | -0.027 (0.004)* |
| <b>PROMIS pain (Yes) AND PROMIS fatigue (Yes)</b>      | -0.041 (0.009)* |
| <b>GAD-7 scale for anxiety (ref: no anxiety)</b>       |                 |
| Mild anxiety                                           | -0.040 (0.005)* |
| Moderate to severe anxiety                             | -0.080 (0.008)* |
| <b>PHQ-9 scale for depression (ref: no depression)</b> |                 |
| Mild to moderate depression                            | -0.053 (0.005)* |
| Moderately severe depression                           | -0.114 (0.007)* |
| <b>GAD_7_n # PROMIS fatigue (Yes)</b>                  |                 |
| Mild anxiety AND fatigue                               | 0.002 (0.011)   |
| Moderate to severe anxiety AND fatigue                 | -0.048 (0.012)* |

PROMIS pain ( $\geq 60$ ); PROMIS fatigue ( $\geq 60$ ); PROMIS bowel incontinence ( $\geq 5$ ); GAD-7 for anxiety (0-4: no or mild anxiety; 5-9 moderate anxiety; 10-20 severe anxiety); PHQ-9 for depression (0-4: no or mild depression; 5-9 moderate depression; 10-20 moderately severe/severe depression); \*p-value $<0.05$ ; Interactions between anxiety and pain, anxiety and incontinence and, anxiety and depression are not presented as not statistically significant

<sup>1</sup>50 years old man with Crohn's disease, diagnosed in last 3 years, not pregnant, normal weight, living alone and in an area of average socioeconomic deprivation, educated at GCSE or AS/A levels, employed, without operation and not receiving biologic medication, never smoker, without physical or mental health comorbidities, without symptoms of pain, fatigue, incontinence, anxiety and depression.

IBD: Inflammatory bowel disease; IMD: Indices of Multiple Deprivation; SE: Standard Error; BMI: Body Mass Index; QoL: Quality of Life; PROMIS: Patient-Reported Outcomes Measurement Information System; GAD-7: Generalised Anxiety Disorder Assessment; PHQ-9: Patient Health Questionnaire.

**Supplementary Table S8: Quality of life (EQ-5D utility) associated with IBD patients' socio-demographic, clinical characteristics, symptoms of fatigue, pain and bowel incontinence, anxiety and depressions, including adjustments for IBD activity and control (N=8486)**

|                                                                     | <b>Stage 1</b>   | <b>Stage 2</b>   | <b>Stage 3</b>   |
|---------------------------------------------------------------------|------------------|------------------|------------------|
| <b>Characteristic</b>                                               | <b>Mean (SE)</b> | <b>Mean (SE)</b> | <b>Mean (SE)</b> |
| QoL of reference individual <sup>1</sup>                            | 0.971 (0.009)*   | 0.972 (0.009)*   | 0.983 (0.009)*   |
| Female sex                                                          | 0.001 (0.004)    | 0.001 (0.004)    | 0.000 (0.003)    |
| Age at time of EQ-5D questionnaire<br>(per 10 years, centred at 50) | 0.000 (0.002)    | 0.000 (0.002)    | -0.004 (0.002)*  |
| Time since diagnosis (ref: 0-3 years)                               |                  |                  |                  |
| 4 years and over                                                    | -0.007 (0.005)   | -0.007 (0.005)   | -0.010 (0.005)   |
| Pregnant                                                            | 0.006 (0.022)    | 0.006 (0.022)    | -0.003 (0.021)   |
| Smoking status (ref: never smoker)                                  |                  |                  |                  |
| Ex-smoker                                                           | -0.011 (0.004)*  | -0.012 (0.004)*  | -0.011 (0.004)*  |
| Current smoker                                                      | -0.024 (0.007)   | -0.024 (0.007)*  | -0.017 (0.007)*  |
| BMI (ref: normal weight)                                            |                  |                  |                  |
| Underweight                                                         | -0.033 (0.011)*  | -0.032 (0.011)*  | -0.028 (0.011)*  |
| Overweight                                                          | -0.019 (0.004)*  | -0.019 (0.004)*  | -0.017 (0.004)*  |
| IMD quintile (ref: 3)                                               |                  |                  |                  |
| 1                                                                   | -0.009 (0.007)   | -0.009 (0.007)   | -0.007 (0.006)   |
| 2                                                                   | 0.004 (0.006)    | 0.003 (0.006)    | 0.002 (0.006)    |
| 4                                                                   | -0.002 (0.006)   | -0.002 (0.006)   | -0.001 (0.005)   |
| 5                                                                   | -0.001 (0.006)   | -0.001 (0.005)   | 0.001 (0.005)    |
| Education level (ref: GCSE or AS/A-                                 |                  |                  |                  |
| No education                                                        | -0.013 (0.011)   | -0.013 (0.011)   | -0.007 (0.011)   |

|                                          |                 |                 |                 |
|------------------------------------------|-----------------|-----------------|-----------------|
| Further and Higher education             | 0.002 (0.004)   | 0.002 (0.004)   | 0.001 (0.004)   |
| Employment status (ref: employed)        |                 |                 |                 |
| Unemployed due to illness                | -0.210 (0.008)* | -0.207 (0.008)* | -0.197 (0.008)* |
| Unemployed                               | -0.063 (0.011)* | -0.062 (0.011)* | -0.055 (0.010)* |
| Student or Homemaker                     | -0.019 (0.008)* | -0.019 (0.008)* | -0.018 (0.007)* |
| Retired                                  | -0.035 (0.006)* | -0.035 (0.006)* | -0.038 (0.005)* |
| Living circumstances (ref: living alone) |                 |                 |                 |
| Living with someone                      | 0.016 (0.004)   | 0.017 (0.004)   | 0.013 (0.004)   |
| IBD type (ref: Crohn's disease)          |                 |                 |                 |
| Other IBD                                | 0.000 (0.004)   | -0.001 (0.004)  | 0.000 (0.004)   |
| IBD operation                            | 0.008 (0.005)   | 0.008 (0.005)   | 0.004 (0.005)   |
| Use of biologic medication               | -0.006 (0.004)  | -0.006 (0.004)  | -0.004 (0.004)  |
| IBD activity (ref: 1, low tertile)       |                 |                 |                 |
| 2                                        | -0.016 (0.005)* | -0.017 (0.005)* | -0.015 (0.004)* |
| 3 (high tertile)                         | -0.029 (0.005)* | -0.029 (0.005)* | -0.027 (0.005)* |
| 4 (stoma/pouch)                          | -0.037 (0.008)* | -0.037 (0.008)* | -0.034 (0.008)* |
| IBD control (ref: 1, best control)       |                 |                 |                 |
| 2                                        | -0.057 (0.005)* | -0.060 (0.005)* | -0.039 (0.005)* |
| 3 (worst control)                        | -0.137 (0.006)* | -0.141 (0.006)* | -0.089 (0.006)* |
| Physical comorbidity                     | -0.027 (0.004)* | -0.027 (0.004)* | -0.026 (0.003)* |
| Mental comorbidity                       | -0.085 (0.004)* | -0.084 (0.004)* | -0.054 (0.004)* |
| PROMIS pain                              | -0.119 (0.005)* | -0.092 (0.007)* | -0.078 (0.006)* |
| PROMIS fatigue                           | -0.111 (0.005)* | -0.092 (0.006)* | -0.051 (0.006)* |
| PROMIS incontinence                      | -0.010 (0.004)* | -0.010 (0.004)* | -0.004 (0.004)  |
| PROMIS pain AND PROMIS fatigue           |                 | -0.057 (0.009)* | -0.060 (0.009)* |

|                                                 |  |  |                 |
|-------------------------------------------------|--|--|-----------------|
| GAD-7 scale for anxiety (ref: no anxiety)       |  |  |                 |
| Mild anxiety                                    |  |  | -0.032 (0.005)* |
| Moderate to severe anxiety                      |  |  | -0.094 (0.006)* |
| PHQ-9 scale for depression (ref: no depression) |  |  |                 |
| Mild to moderate depression                     |  |  | -0.033 (0.005)* |
| Moderately severe depression                    |  |  | -0.085 (0.007)* |

IBD activity: CD activity tertiles (1:0-13, 2:14-94, 3:95 and over), UC activity tertiles (1:0, 2:1, 3:2-6); IBD control: tertiles (1: 15-16 [best control], 2: 9-14 and 3: 0-8 [worst control]), PROMIS pain ( $\geq 60$ ); PROMIS fatigue ( $\geq 60$ ); PROMIS bowel incontinence ( $\geq 5$ ); \*p-value<0.05.

<sup>1</sup>50 years old man with Crohn's disease, diagnosed in last 3 years, not pregnant, normal weight, living alone and in an area of average socioeconomic deprivation, educated at GCSE or AS/A levels, employed, without operation and not receiving biologic medication, never smoker, low tertile of IBD activity, best tertile for IBD control, without physical or mental health comorbidities, and in models 2 and 3, without respective symptoms of pain, fatigue, incontinence, anxiety and depression.

**Supplementary Table S9: Quality of life (EQ-5D utility) associated with socio-demographic, clinical characteristics, symptoms of fatigue, pain and bowel incontinence and with anxiety and depression, by IBD type**

|                                                                     | CD (N=4168 participants) |                 |                 | Other IBD (N=4318 participants) |                 |                 |
|---------------------------------------------------------------------|--------------------------|-----------------|-----------------|---------------------------------|-----------------|-----------------|
|                                                                     | Stage 1                  | Stage 2         | Stage 3         | Stage 1                         | Stage 2         | Stage 3         |
| Characteristic                                                      | Mean (SE)                | Mean (SE)       | Mean (SE)       | Mean (SE)                       | Mean (SE)       | Mean (SE)       |
| QoL of reference individual <sup>1</sup>                            | 0.931 (0.013)*           | 0.929 (0.013)*  | 0.963 (0.013)*  | 0.919 (0.012)*                  | 0.919 (0.012)*  | 0.952 (0.011)*  |
| Female sex                                                          | -0.015 (0.006)*          | -0.015 (0.006)* | -0.014 (0.005)* | 0.000 (0.005)                   | 0.000 (0.005)   | 0.004 (0.005)   |
| Age at time of EQ-5D questionnaire<br>(per 10 years, centred at 50) | 0.006 (0.003)*           | 0.006 (0.003)*  | -0.002 (0.002)  | 0.006 (0.002)*                  | 0.006 (0.002)*  | 0.000 (0.002)   |
| Time since diagnosis (ref: 0-3 years)                               |                          |                 |                 |                                 |                 |                 |
| 4 years and over                                                    | 0.012 (0.008)            | 0.012 (0.008)   | 0.004 (0.008)   | -0.002 (0.007)                  | -0.002 (0.007)  | -0.009 (0.006)  |
| Pregnant                                                            | 0.015 (0.030)            | 0.015 (0.030)   | 0.002 (0.027)   | 0.013 (0.033)                   | 0.013 (0.033)   | -0.004 (0.031)  |
| Smoking status (ref: never smoker)                                  |                          |                 |                 |                                 |                 |                 |
| Ex-smoker                                                           | -0.013 (0.006)*          | -0.014 (0.006)* | -0.010 (0.005)  | -0.017 (0.005)*                 | -0.017 (0.005)* | -0.016 (0.005)* |
| Current smoker                                                      | -0.028 (0.010)*          | -0.029 (0.009)* | -0.016 (0.009)  | -0.027 (0.013)*                 | -0.027 (0.013)* | -0.020 (0.012)  |
| BMI (ref: normal weight)                                            |                          |                 |                 |                                 |                 |                 |
| Underweight                                                         | -0.033 (0.016)*          | -0.032 (0.016)* | -0.031 (0.015)* | -0.039 (0.019)*                 | -0.039 (0.019)  | -0.026 (0.018)  |

|                                          |                 |                 |                 |                 |                 |                 |
|------------------------------------------|-----------------|-----------------|-----------------|-----------------|-----------------|-----------------|
| Overweight                               | -0.015 (0.006)* | -0.016 (0.006)* | -0.013 (0.005)* | -0.024 (0.005)* | -0.024 (0.005)* | -0.019 (0.005)* |
| IMD quintile (ref: 3)                    |                 |                 |                 |                 |                 |                 |
| 1                                        | -0.010 (0.010)  | -0.010 (0.010)  | -0.009 (0.009)  | -0.012 (0.009)  | -0.012 (0.009)  | -0.008 (0.008)  |
| 2                                        | -0.003 (0.009)  | -0.003 (0.009)  | -0.005 (0.008)  | 0.010 (0.008)   | 0.010 (0.008)   | 0.008 (0.007)   |
| 4                                        | 0.001 (0.009)   | 0.001 (0.009)   | 0.003 (0.008)   | -0.006 (0.008)  | -0.006 (0.008)  | -0.005 (0.007)  |
| 5                                        | 0.001 (0.008)   | 0.001 (0.008)   | 0.003 (0.007)   | 0.001 (0.007)   | 0.001 (0.007)   | 0.001 (0.007)   |
| Education level (ref: GCSE or AS/A-      |                 |                 |                 |                 |                 |                 |
| No education                             | -0.029 (0.018)  | -0.029 (0.018)  | -0.018 (0.017)  | -0.004 (0.015)  | -0.004 (0.015)  | 0.000 (0.014)   |
| Further and Higher education             | 0.003 (0.006)   | -0.003 (0.006)  | -0.004 (0.005)  | 0.011 (0.006)   | 0.011 (0.006)   | 0.009 (0.005)   |
| Employment status (ref: employed)        |                 |                 |                 |                 |                 |                 |
| Unemployed due to illness                | -0.195 (0.011)* | -0.193 (0.011)* | -0.178 (0.010)* | -0.258 (0.013)* | -0.257 (0.013)* | -0.244 (0.013)* |
| Unemployed                               | -0.075 (0.016)* | -0.072 (0.016)* | -0.062 (0.014)* | -0.059 (0.017)* | -0.059 (0.017)* | -0.049 (0.016)* |
| Student or Homemaker                     | -0.021 (0.011)  | -0.021 (0.011)  | -0.022 (0.011)* | -0.009 (0.011)  | -0.009 (0.011)  | -0.008 (0.011)  |
| Retired                                  | -0.041 (0.009)* | -0.041 (0.009)* | -0.046 (0.008)* | -0.028 (0.008)* | -0.028 (0.008)* | -0.033 (0.007)* |
| Living circumstances (ref: living alone) |                 |                 |                 |                 |                 |                 |
| Living with someone                      | 0.010 (0.006)   | 0.011 (0.006)   | 0.004 (0.006)   | 0.026 (0.006)*  | 0.026 (0.006)*  | 0.021 (0.005)*  |
| IBD operation                            | -0.001 (0.006)  | -0.001 (0.006)  | -0.003 (0.005)  | -0.009 (0.008)  | -0.009 (0.008)  | -0.011 (0.008)  |

|                                                 |                 |                 |                 |                 |                 |                 |
|-------------------------------------------------|-----------------|-----------------|-----------------|-----------------|-----------------|-----------------|
| Use of biologic medication                      | -0.002 (0.006)  | -0.002 (0.006)  | -0.001 (0.006)  | -0.011 (0.006)  | -0.011 (0.005)  | -0.006 (0.005)  |
| Physical comorbidity                            | -0.033 (0.006)* | -0.034 (0.006)* | -0.029 (0.005)* | -0.028 (0.005)* | -0.028 (0.005)* | -0.028 (0.005)* |
| Mental comorbidity                              | -0.104 (0.006)* | -0.104 (0.006)* | -0.063 (0.006)* | -0.086 (0.006)* | -0.086 (0.006)* | -0.046 (0.006)* |
| PROMIS pain                                     | -0.159 (0.007)* | -0.137 (0.010)* | -0.098 (0.009)* | -0.160 (0.007)* | -0.153 (0.010)* | -0.114 (0.009)* |
| PROMIS fatigue                                  | -0.140 (0.007)* | -0.124 (0.008)* | -0.061 (0.008)* | -0.141 (0.007)* | -0.136 (0.008)* | -0.069 (0.008)* |
| PROMIS incontinence                             | -0.045 (0.006)* | -0.046 (0.006)* | -0.023 (0.006)* | -0.051 (0.005)* | -0.051 (0.005)* | -0.030 (0.005)* |
| PROMIS pain AND PROMIS fatigue                  |                 | -0.046 (0.014)* | -0.060 (0.013)* |                 | -0.017 (0.014)  | -0.036 (0.014)* |
| GAD-7 scale for anxiety (ref: no anxiety)       |                 |                 |                 |                 |                 |                 |
| Mild anxiety                                    |                 |                 | -0.044 (0.007)* |                 |                 | -0.031 (0.006)* |
| Moderate to severe anxiety                      |                 |                 | -0.108 (0.009)* |                 |                 | -0.094 (0.009)* |
| PHQ-9 scale for depression (ref: no depression) |                 |                 |                 |                 |                 |                 |
| Mild to moderate depression                     |                 |                 | -0.040 (0.007)* |                 |                 | -0.059 (0.006)* |
| Moderately severe depression                    |                 |                 | -0.110 (0.009)* |                 |                 | -0.112 (0.009)* |

PROMIS pain ( $\geq 60$ ); PROMIS fatigue ( $\geq 60$ ); PROMIS bowel incontinence ( $\geq 5$ ); \*p-value $<0.05$ .

<sup>1</sup>50 years old man with Crohn's disease or Other IBD, respectively, diagnosed in last 3 years, not pregnant, normal weight, living alone and in an area of average socioeconomic deprivation, educated at GCSE or AS/A levels, employed, without operation and not receiving biologic medication, never smoker, without physical or mental health comorbidities, and in models 2 and 3, without respective symptoms of pain, fatigue, incontinence, anxiety and depression

**Supplementary Table S10: Quality of life (EQ-5D utility) associated with socio-demographic, clinical characteristics, symptoms of fatigue, pain and bowel incontinence and with anxiety and depression, by gender**

|                                                                     | Female (N=4888 participants) |                |                 | Male (N=3285 participants) |                 |                 |
|---------------------------------------------------------------------|------------------------------|----------------|-----------------|----------------------------|-----------------|-----------------|
|                                                                     | Stage 1                      | Stage 2        | Stage 3         | Stage 1                    | Stage 2         | Stage 3         |
| Characteristic                                                      | Mean (SE)                    | Mean (SE)      | Mean (SE)       | Mean (SE)                  | Mean (SE)       | Mean (SE)       |
| QoL of reference individual <sup>1</sup>                            | 0.911 (0.012)*               | 0.909 (0.012)* | 0.942 (0.011)*  | 0.947 (0.014)*             | 0.946 (0.014)*  | 0.982 (0.013)*  |
| Age at time of EQ-5D questionnaire<br>(per 10 years, centred at 50) | 0.007 (0.002)*               | 0.007 (0.002)* | 0.000 (0.002)   | 0.003 (0.003)              | 0.003 (0.003)   | -0.004 (0.003)  |
| Time since diagnosis (ref: 0-3 years)                               |                              |                |                 |                            |                 |                 |
| 4 years and over                                                    | 0.002 (0.007)                | 0.002 (0.007)  | -0.003 (0.006)  | 0.003 (0.008)              | 0.003 (0.008)   | -0.007 (0.008)  |
| Pregnant                                                            | 0.013 (0.023)                | 0.014 (0.023)  | 0.000 (0.022)   | -                          | -               | -               |
| Smoking status (ref: never smoker)                                  |                              |                |                 |                            |                 |                 |
| Ex-smoker                                                           | -0.010 (0.005)               | -0.011 (0.005) | -0.010 (0.005)* | -0.023 (0.006)             | -0.023 (0.006)  | -0.017 (0.006)* |
| Current smoker                                                      | -0.013 (0.010)               | -0.013 (0.010) | -0.003 (0.009)  | -0.056 (0.013)             | -0.056 (0.013)  | -0.043 (0.012)* |
| BMI (ref: normal weight)                                            |                              |                |                 |                            |                 |                 |
| Underweight                                                         | -0.033 (0.014)*              | -0.032 (0.014) | -0.020 (0.013)  | -0.033 (0.021)             | -0.033 (0.021)  | -0.037 (0.020)  |
| Overweight                                                          | -0.022 (0.005)*              | -0.022 (0.005) | -0.017 (0.005)* | -0.017 (0.006)*            | -0.017 (0.006)* | -0.015 (0.005)  |



|                                          |                 |                 |                 |                 |                 |                 |
|------------------------------------------|-----------------|-----------------|-----------------|-----------------|-----------------|-----------------|
| IMD quintile (ref: 3)                    |                 |                 |                 |                 |                 |                 |
| 1                                        | -0.015 (0.009)  | -0.016 (0.009)  | -0.012 (0.008)  | -0.006 (0.009)  | -0.006 (0.009)  | -0.005 (0.009)  |
| 2                                        | 0.006 (0.008)   | 0.006 (0.008)   | 0.004 (0.007)   | -0.002 (0.009)  | -0.002 (0.009)  | -0.003 (0.008)  |
| 4                                        | -0.001 (0.008)  | -0.001 (0.008)  | 0.000 (0.007)   | -0.007 (0.008)  | -0.007 (0.008)  | -0.006 (0.008)  |
| 5                                        | -0.001 (0.008)  | -0.001 (0.008)  | 0.003 (0.007)   | 0.003 (0.009)   | 0.003 (0.009)   | 0.000 (0.008)   |
| Education level (ref: GCSE or AS/A-      |                 |                 |                 |                 |                 |                 |
| No education                             | -0.038 (0.017)* | -0.036 (0.007)* | -0.024 (0.016)  | 0.003 (0.015)   | 0.002 (0.015)   | 0.004 (0.014)   |
| Further and Higher education             | 0.002 (0.005)   | 0.002 (0.005)   | 0.001 (0.005)   | 0.005 (0.006)   | 0.005 (0.006)   | 0.003 (0.006)   |
| Employment status (ref: employed)        |                 |                 |                 |                 |                 |                 |
| Unemployed due to illness                | -0.218 (0.011)* | -0.215 (0.010)* | -0.201 (0.010)* | -0.202 (0.014)* | -0.201 (0.014)* | -0.188 (0.013)* |
| Unemployed                               | -0.084 (0.016)* | -0.083 (0.016)* | -0.066 (0.015)* | -0.047(0.016)*  | -0.047 (0.016)* | -0.044 (0.015)* |
| Student or Homemaker                     | -0.015 (0.009)  | -0.015 (0.009)  | -0.014 (0.009)  | -0.016 (0.017)  | -0.016 (0.017)  | -0.022 (0.016)  |
| Retired                                  | -0.041 (0.008)* | -0.041 (0.008)* | -0.045 (0.007)* | -0.023 (0.008)* | -0.022 (0.009)* | -0.029 (0.008)* |
| Living circumstances (ref: living alone) |                 |                 |                 |                 |                 |                 |
| Living with someone                      | 0.016 (0.005)*  | 0.016 (0.005)*  | 0.012 (0.005)*  | 0.021 (0.007)*  | 0.021 (0.007)*  | 0.013 (0.006)*  |
| IBD type (ref: Crohn's disease)          |                 |                 |                 |                 |                 |                 |
| Other IBD                                | 0.010 (0.006)   | 0.009 (0.005)   | 0.010 (0.005)*  | -0.017 (0.006)* | -0.017 (0.006)* | -0.016 (0.006)* |
| IBD operation                            | 0.002 (0.006)   | 0.002 (0.006)   | -0.002 (0.006)  | -0.010 (0.007)  | -0.010 (0.007)  | -0.009 (0.006)  |

|                                                 |                 |                 |                 |                 |                 |                 |
|-------------------------------------------------|-----------------|-----------------|-----------------|-----------------|-----------------|-----------------|
| Use of biologic medication                      | -0.004 (0.006)  | -0.004 (0.006)  | -0.001 (0.006)  | -0.010 (0.006)  | -0.010 (0.006)  | -0.006 (0.006)  |
| Physical comorbidity                            | -0.029 (0.005)* | -0.029 (0.005)* | -0.028 (0.005)* | -0.031 (0.006)* | -0.031 (0.006)* | -0.028 (0.005)  |
| Mental comorbidity                              | -0.097 (0.006)* | -0.097 (0.006)* | -0.059 (0.005)* | -0.095 (0.008)* | -0.094 (0.008)* | -0.050 (0.007)  |
| PROMIS pain                                     | -0.163 (0.006)* | -0.140 (0.009)* | -0.106 (0.008)* | -0.157 (0.008)* | -0.151 (0.011)* | -0.103 (0.010)* |
| PROMIS fatigue                                  | -0.132 (0.006)* | -0.117 (0.007)* | -0.058 (0.007)* | -0.162 (0.008)* | -0.157 (0.010)* | -0.080 (0.010)* |
| PROMIS incontinence                             | -0.040 (0.005)* | -0.041 (0.005)* | -0.023 (0.005)* | -0.057 (0.006)* | -0.058 (0.006)* | -0.032 (0.006)* |
| PROMIS pain AND PROMIS fatigue                  |                 | -0.046 (0.012)* | -0.059 (0.011)* |                 | -0.016 (0.017)  | -0.041 (0.016)  |
| GAD-7 scale for anxiety (ref: no anxiety)       |                 |                 |                 |                 |                 |                 |
| Mild anxiety                                    |                 |                 | -0.034 (0.006)* |                 |                 | -0.044 (0.007)* |
| Moderate to severe anxiety                      |                 |                 | -0.101 (0.008)* |                 |                 | -0.102 (0.010)* |
| PHQ-9 scale for depression (ref: no depression) |                 |                 |                 |                 |                 |                 |
| Mild to moderate depression                     |                 |                 | -0.044 (0.006)* |                 |                 | -0.058 (0.007)* |
| Moderately severe depression                    |                 |                 | -0.103 (0.008)* |                 |                 | -0.121 (0.010)* |

PROMIS pain ( $\geq 60$ ); PROMIS fatigue ( $\geq 60$ ); PROMIS bowel incontinence ( $\geq 5$ ); \*p-value $<0.05$ .

<sup>1</sup>50 years old woman or man, respectively, with Crohn's disease, diagnosed in last 3 years, not pregnant (if woman), normal weight, living alone and in an area of average socioeconomic deprivation, educated at GCSE or AS/A levels, employed, without operation and not receiving biologic medication, never smoker, without physical or mental health comorbidities, and in models 2 and 3, without respective symptoms of pain, fatigue, incontinence, anxiety and depression
